# Supplementary material for: ABRAXAS1 orchestrates BRCA1 activities to counter genome destabilizing repair pathways—lessons from breast cancer patients
Source: PubMed Central journal article supplement (PMC10192442; doi:10.1038/s41419-023-05845-6), 2023-05-17
Supplement: 41419_2023_5845_MOESM2_ESM.pdf [file 41419_2023_5845_MOESM2_ESM.pdf]

# Extended Figure E1

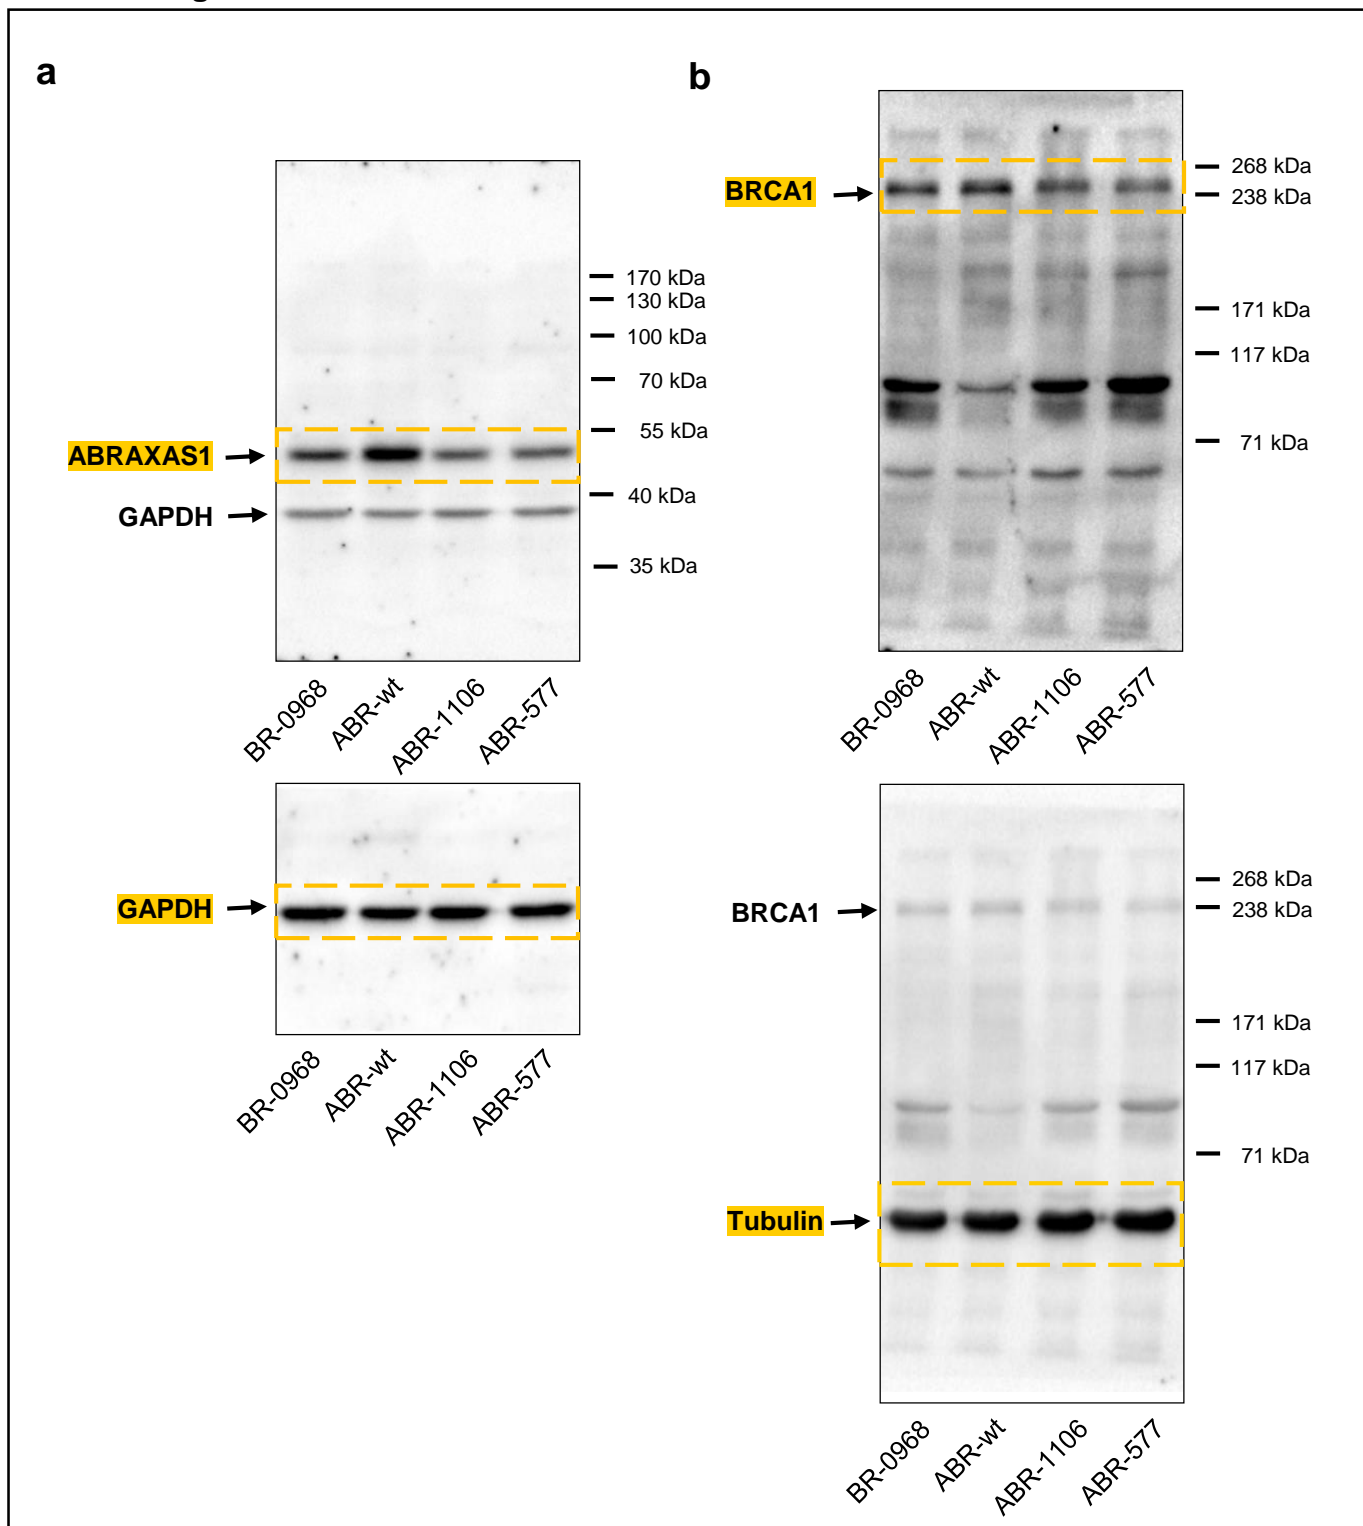

**Fig E1: Original western blots of FigS1, bands shown in FigS1 are highlighted with yellow background. Yellow dashed lines on blots mark edges where blots were cut.**

**a: Original western blots of Fig S1a.**

**b: Original western blots of Fig S1b.**

## Extended Figure E2

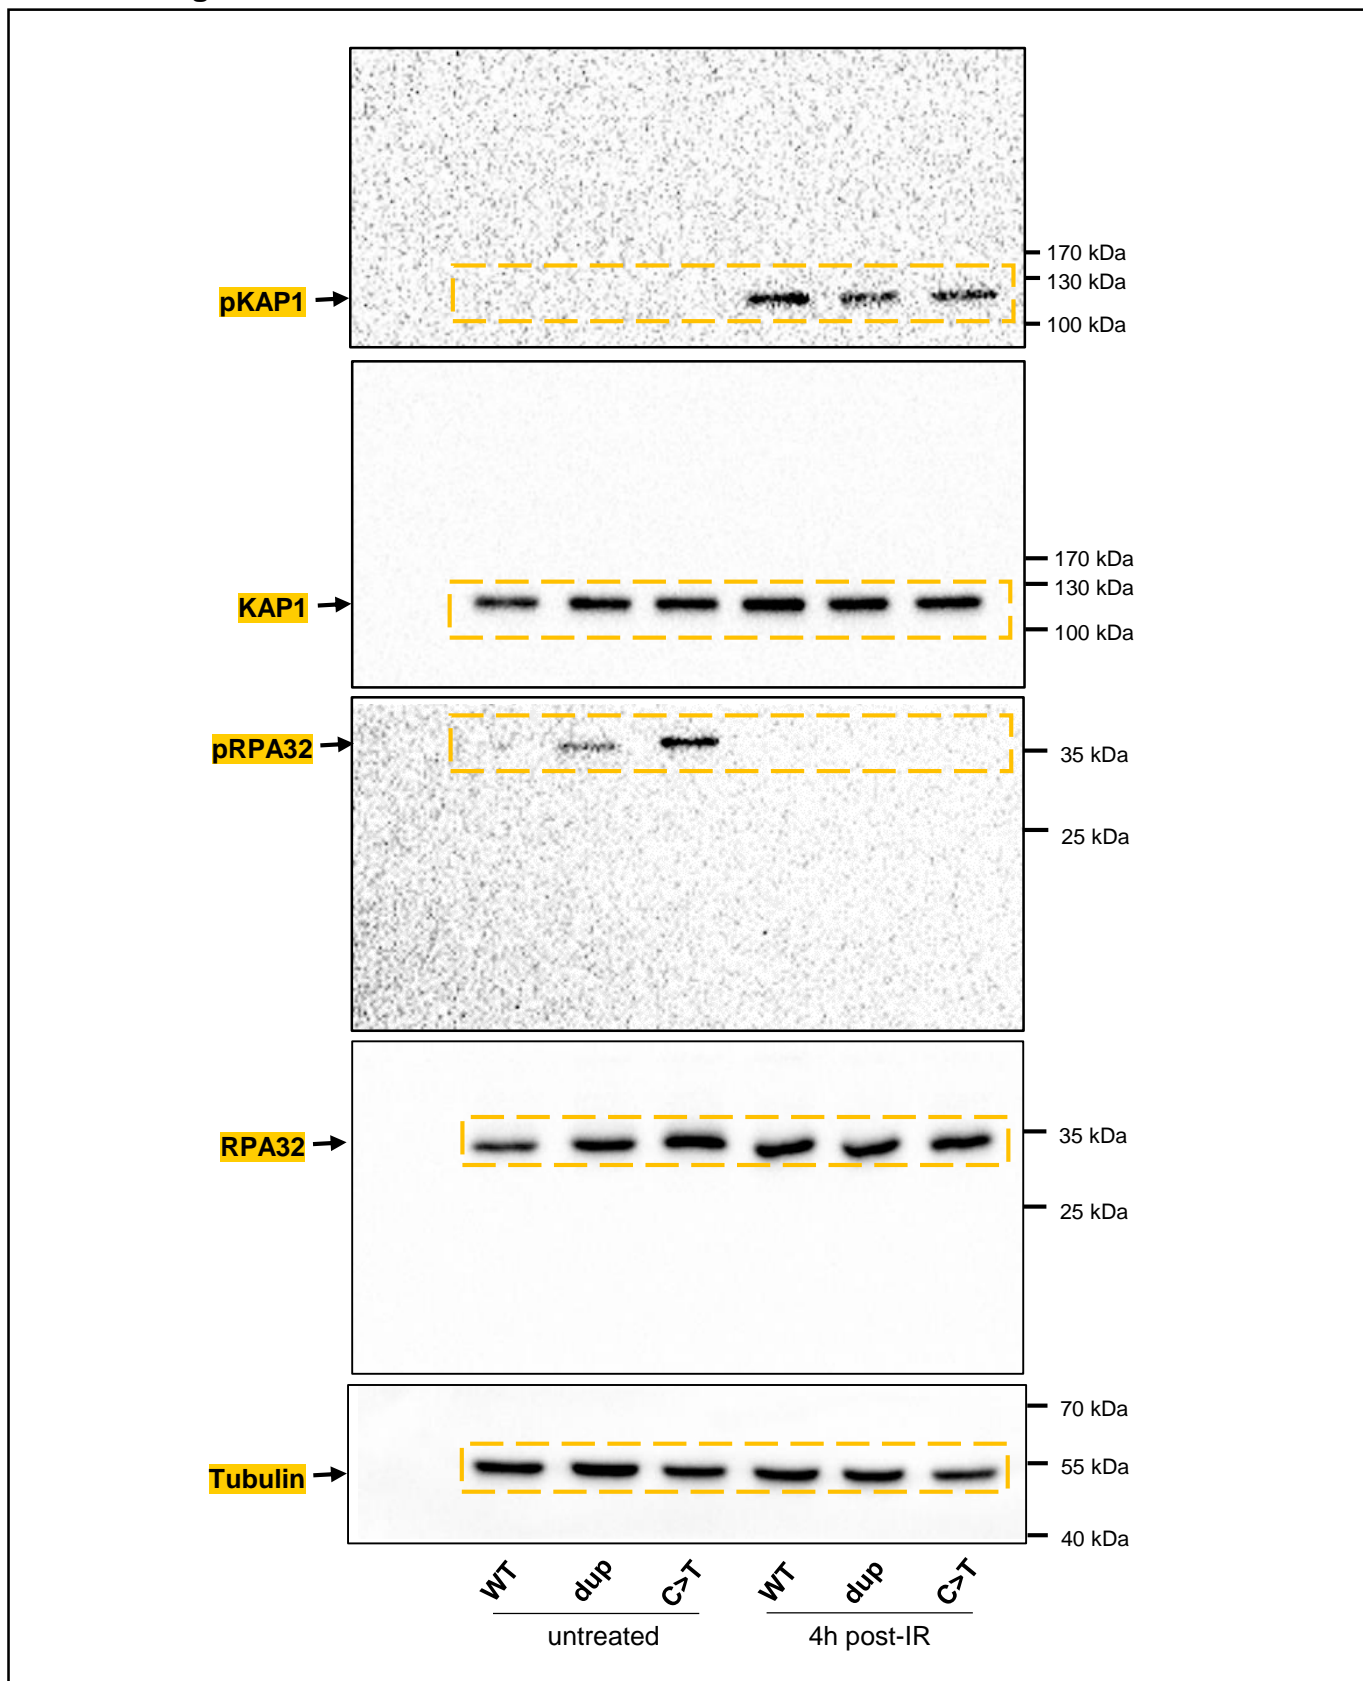

Fig E2: Original western blots of Fig4e, bands shown in Fig4e are highlighted with yellow background. Yellow dashed lines on blots mark edges where blots were cut.

## Extended Figure E2

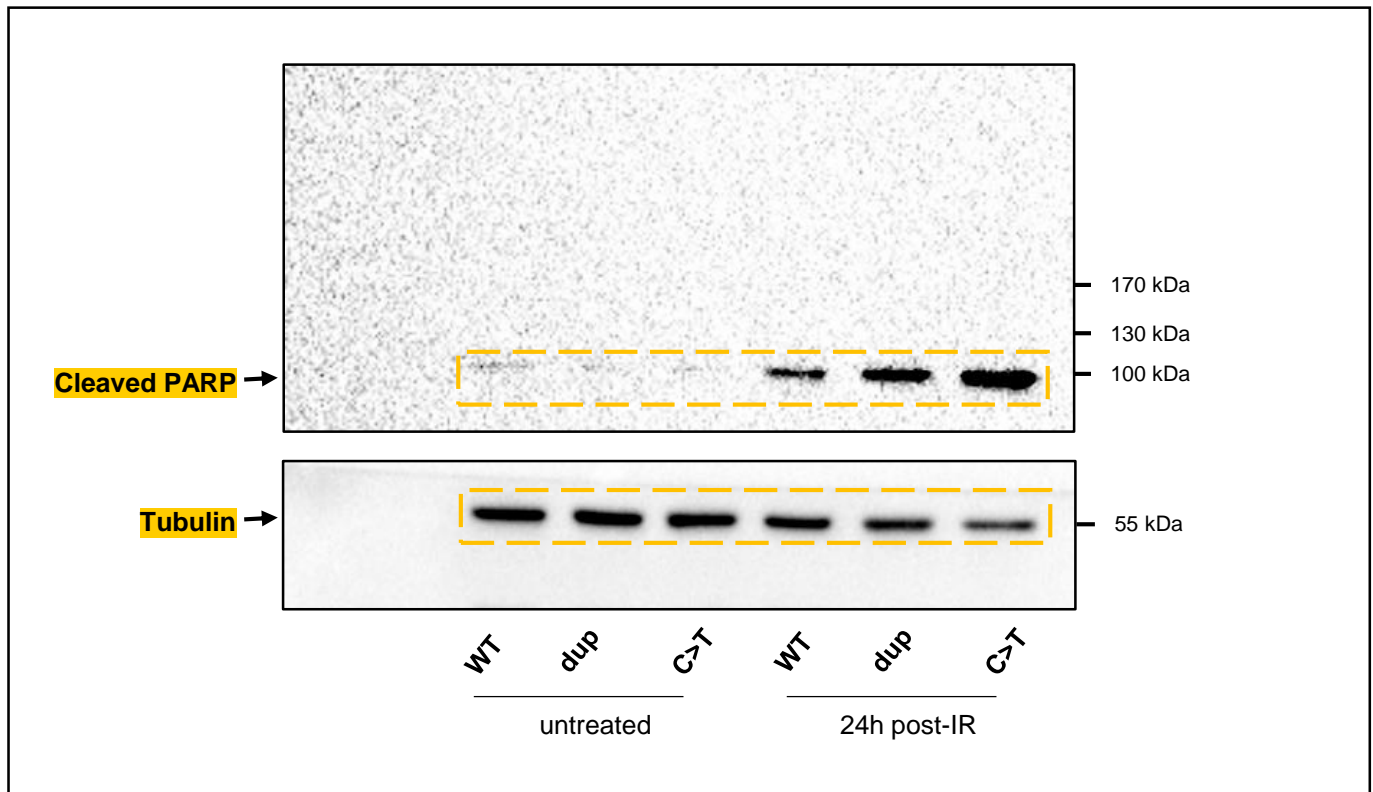

Fig E3: Original western blots of FigS7d, bands shown in FigS7d are highlighted with yellow background. Yellow dashed lines on blots mark edges where blots were cut.
